# Supplementary material for: Adherence to Culturally Tailored Dietary Guideline and Breast Cancer Risk Reduction: A Cross-Cultural Nested Case-Control Study
Source: Research Square preprint supplement (doi:10.21203/rs.3.rs-6867878/v1), 2025-07-14
Supplement: Supplementary file 1 [file 2be1b6028eb090f62aeecbb5.docx]

**Supplementary Table 1. Chinese Food Guide Pagoda 2016 components and scores in the BCCS-CW**

|  |  | Standard for | |  |  |  |  |
| --- | --- | --- | --- | --- | --- | --- | --- |
| Components a | Recommended intake | Maximum | Minimum | Maximum point | CHEP-2016 score b | OR (95%CI) c | *P* |
| Dairy products | >300 g/d | >300 g/d | 0 g/d | 5 | 0.68±1.24 | 1.20(1.03-1.40) | 0.02 |
| Beans | 25-35 g/d | >35 g/d | 0 g/d | 5 | 0.05±0.09 | 0.48(0.05-5.00) | 0.54 |
| Meat poultry | 40-75 g/d | <75 g/d | >112.5 g/d | 4 | 3.25±1.46 | 0.58(0.19-1.74) | 0.33 |
| Egg | 40-50 g/d | <50 g/d | >75 g/d | 3 | 2.45±0.80 | 0.88(0.70-1.19) | 0.31 |
| Fish | 40-75 g/d 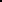 | >75 g/d | 0 g/d | 3 | 0.42±0.68 | 0.90(0.63-1.28) | 0.56 |
| Vegetables | 300-500 g/d | >500 g/d | 0 g/d | 5 | 2.31±1.42 | 0.90(0.77-1.06) | 0.20 |
| Fruits | 200-400 g/d | >350 g/d | 0 g/d | 5 | 2.57±1.66 | 0.77(0.67-0.90) | <0.001 |
| Grains | 250-400 g/d | >400 g/d | 0 g/d | 5 | 3.35±1.45 | 0.75(0.64-0.89) | <0.001 |
| Alcohol | <15 g/d | <15 g/d | >22.5 g/d | 5 | 4.99±0.26 | 0.69(0.38-0.26) | 0.23 |
| Total c |  |  |  | 40 | 20.07±4.13 | 0.93(0.88-0.98) | 0.01 |

Abbreviations: BC, breast cancer: CHFP-2016, Chinese Food Guide Pagoda 2016; OR, Odds Ratio; CI, Confidence Interval; SD, Standard Deviation.

a Components, maximum/minimum points and standards were based on Chinese Food Pagoda 2016(CHFP-2016). nine items were included in this study, except daily intake of water oil 、salt and sugar, due to the lack of data.

b Intakes between minimum and maximum levels were scored proportionately following the formulas: (actual intake amount / intake amount for maximum point) × maximum point, for components with recommendation of lower limit of intake amount; (intake amount for minimum point - actual intake amount) / (intake amount for minimum point - intake amount for maximum point) × maximum point, for components with recommendation of upper limit of intake amount. Data were shown as mean ± SD.

c Conditional logistic regression model was additionally adjusted for age at survey, whether stopped menstruating for over a year, BMI, marital status, education level, income level, family history of cancer，whether have taken hormones, progesterone, or other female hormones.

**Supplementary Table 2. Chinese Food Guide Pagoda 2016 components and scores in participants from the National Health and Nutrition Examination Survey (NHANES)2005-2016.a**

|  |  | Standard for | |  |  |  |  |
| --- | --- | --- | --- | --- | --- | --- | --- |
| Components a | Recommended intake | Maximum | Minimum | Maximum point | CHEP-2022 score b | OR (95%CI) c | *P* |
| Dairy products | 300-500 g/d | >500 g/d | 0 g/d | 5 | 3.53±0.03 | 0.78(0.62, 0.98) | 0.03 |
| Beans | 25-35 g/d | >35 g/d | 0 g/d | 5 | 3.99±0.02 | 1.25(0.93, 1.68) | 0.13 |
| Meat poultry | 40-75g/d | <75 g/d | >112.5 g/d | 4 | 2.80±0.03 | 0.85(0.66, 1.08) | 0.18 |
| Aquatic products | 40-75 g/d 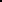 | >75 g/d | 0 g/d | 3 | 0.65±0.04 | 1.00(0.78, 1.27) | 0.99 |
| Egg | 300-350 g/w | <350 g/w | >525 g/w | 3 | 2.85±0.01 | 1.26(0.55, 2.92) | 0.58 |
| Vegetables | 300-500 g/d | >500 g/d | 0 g/d | 5 | 2.93±0.03 | 0.85(0.68, 1.07) | 0.16 |
| Fruits | 200-350 g/d | >300 g/d | 0 g/d | 5 | 1.82±0.04 | 0.92(0.78, 1.09) | 0.36 |
| Grains | 250-400 g/d | >400 g/d | 0 g/d | 5 | 1.93±0.02 | 0.67(0.38, 1.17) | 0.16 |
| Alcohol | <15 g/d | <15 g/d | >22.5 g/d | 5 | 4.34±0.03 | 1.02(0.77, 1.34) | 0.91 |
| Sugar | 25-50 g/d | <25g/d | >75g/d | 5 | 2.54±0.03 | 0.96(0.72, 1.29) | 0.79 |
| Oil | 25-30 g/d | <30 g/d | >45 g/d | 5 | 4.22±0.03 | 0.98(0.72, 1.35) | 0.91 |
| Total |  |  |  | 50 | 31.07±0.10 | 0.90(0.85, 0.96) | 0.001 |

Abbreviations: BC, breast cancer； CHFP-2016, Chinese Food Guide Pagoda 2016; OR, Odds Ratio; CI, Confidence Interval; SD, Standard Deviation.

a Components, maximum/minimum points and standards were based on Chinese Food Guide Pagoda 2016(CHFP-2016). eleven items were included in this study, except daily intake of water and salt, due to the lack of data.

b Intakes between minimum and maximum levels were scored proportionately following the formulas: (actual intake amount / intake amount for maximum point) × maximum point, for components with recommendation of lower limit of intake amount; (intake amount for minimum point - actual intake amount) / (intake amount for minimum point - intake amount for maximum point) × maximum point, for components with recommendation of upper limit of intake amount. Data were shown as mean ± SD.

c Logistic regression model was additionally adjusted for age at survey, whether stopped menstruating for over a year, energy, BMI, ethnic, marital status, education level, income level, diabetes, cardiovascular disease, dyslipidemia, MET, whether have taken hormones, progesterone, or other female hormones.

**Supplementary Table 3. Chinese Food Guide Pagoda 2022 components and scores in participants from the National Health and Nutrition Examination Survey (NHANES)2005-2016.a**

|  |  | Standard for | |  |  |  |  |
| --- | --- | --- | --- | --- | --- | --- | --- |
| Components a | Recommended intake | Maximum | Minimum | Maximum point | CHEP-2022 score b | OR (95%CI) c | *P* |
| Dairy products | 300-500 g/d | >500 g/d | 0 g/d | 5 | 2.79±0.03 | 0.77(0.59, 1.01) | 0.06 |
| Beans | 25-35 g/d | >35 g/d | 0 g/d | 5 | 3.99±0.02 | 1.25(0.93, 1.68) | 0.13 |
| Meat poultry | 40-75 g/d | <75 g/d | >112.5 g/d | 4 | 2.80±0.03 | 0.85(0.66, 1.08) | 0.18 |
| Aquatic products | 40-75 g/d 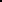 | >75 g/d | 0 g/d | 3 | 0.65±0.04 | 1.00(0.78, 1.27) | 0.99 |
| Egg | 300-350 g/w | <350 g/w | >525 g/w | 3 | 2.85±0.01 | 1.25(0.55, 2.85) | 0.59 |
| Vegetables | 300-500 g/d | >500 g/d | 0 g/d | 5 | 2.93±0.03 | 0.85(0.68, 1.07) | 0.16 |
| Fruits | 200-350 g/d | >300 g/d | 0 g/d | 5 | 1.96±0.04 | 0.94(0.79, 1.11) | 0.44 |
| Grains | 250-400 g/d | >400 g/d | 0 g/d | 5 | 1.93±0.02 | 0.67(0.38, 1.17) | 0.16 |
| Alcohol | <15 g/d | <15 g/d | >22.5 g/d | 5 | 4.34±0.03 | 1.02(0.77, 1.34) | 0.91 |
| Sugar | 25-50 g/d | <25 g/d | >75 g/d | 5 | 2.54±0.03 | 0.96(0.72, 1.29) | 0.79 |
| Oil | 25-30 g/d | <30 g/d | >45 g/d | 5 | 4.22±0.03 | 0.98(0.72, 1.35) | 0.91 |
| Total |  |  |  | 50 | 31.00±0.11 | 0.70(0.56, 0.88) | 0.002 |

Abbreviations: BC, breast cancer；CHFP-2022, Chinese Food Guide Pagoda 2022; OR, Odds Ratio; CI, Confidence Interval; SD, Standard Deviation.

a Components, maximum/minimum points and standards were based on Chinese Food Guide Pagoda 2016(CHFP-2016). eleven items were included in this study, except daily intake of water and salt, due to the lack of data.

b Intakes between minimum and maximum levels were scored proportionately following the formulas: (actual intake amount / intake amount for maximum point) × maximum point, for components with recommendation of lower limit of intake amount; (intake amount for minimum point - actual intake amount) / (intake amount for minimum point - intake amount for maximum point) × maximum point, for components with recommendation of upper limit of intake amount. Data were shown as mean ± SD.

c Logistic regression model was additionally adjusted for age at survey, whether stopped menstruating for over a year, energy, BMI, ethnic, marital status, education level, income level, hypertension, diabetes, cardiovascular disease, dyslipidemia, MET, whether have taken hormones, progesterone, or other female hormones.

**Supplementary Table 4. Characteristics by Chinese Food Guide Pagoda 2016 quartiles among participants from the BCCS-CW**

|  | NO. (%) (n=532) a | | | | |
| --- | --- | --- | --- | --- | --- |
| Characteristic | Quartile 1 c | Quartile 2 | Quartile 3 | Quartile 4 | *P* |
| Age at survey, mean (SD)b | 15.68 (1.78) | 19.62 (0.87) | 22.49 (0.87) | 26.14 (1.96) | <0.01 |
| CHFP-2016，mean (SD) | 15.68 (1.78) | 19.62 (0.87) | 22.49 (0.87) | 26.14 (1.96) | <0.01 |
| CHFP-2022，mean (SD) |  |  |  |  | 0.69 |
| Stopped menstruating for over a year | 67 (50.38) | 68 (51.13) | 68 (51.14) | 64 (48.12) |  |
| Yes | 66 (49.62) | 65 (48.87) | 65 (48.88) | 69 (51.88) |  |
| No |  |  |  |  | 0.31 |
| Marital status | 121 (90.98) | 122 (91.73) | 122 (91.74) | 125 (93.98) |  |
| Married or living with partner | 12 (9.02) | 11 (8.27) | 11 (8.28) | 8 (6.02) |  |
| Never married, separated or otherwise |  |  |  |  | 0.17 |
| BMI at survey (kg/m2) | 63 (47.37) | 70 (52.63) | 70 (52.64) | 60 (45.11) |  |
| < 25 | 70 (52.63) | 63 (47.37) | 63 (47.38) | 73 (54.89) |  |
| ≥ 25 |  |  |  |  | 0.39 |
| educational level (y) | 63 (47.37) | 57 (42.86) | 57 (42.87) | 45 (33.83) |  |
| ≤ 6 | 53 (39.85) | 61 (45.86) | 61 (45.87) | 70 (52.63) |  |
| 7-9 | 11 (8.27) | 13 (9.77) | 13 (9.78) | 12 (9.02) |  |
| 10-12 | 6 (4.51) | 2 (1.50) | 2 (1.51) | 6 (4.51) |  |
| > 12 |  |  |  |  | 0.91 |
| Annual income level | 25 (18.80) | 27 (20.30) | 27 (20.31) | 22 (16.54) |  |
| < 12k | 72 (54.14) | 63 (47.37) | 63 (47.38) | 73 (54.89) |  |
| 12k-36K | 23 (17.29) | 29 (21.80) | 29 (21.81) | 24 (18.05) |  |
| 36K-60K | 13 (9.77) | 14 (10.53) | 14 (10.54) | 14 (10.53) |  |
| ≥ 60K |  |  |  |  | 0.60 |
| Family history of cancer | 28 (21.05) | 25 (18.80) | 25 (18.81) | 27 (20.30) |  |
| Yes | 105 (78.95) | 108 (81.20) | 108 (81.21) | 106 (79.70) |  |
| No |  |  |  |  | 0.33 |
| Have taken hormones, progesterone, or other female hormones | 132 (99.25) | 129 (96.99) | 129 (96.100) | 128 (96.24) |  |
| Other | 1 (0.75) | 4 (3.01) | 4 (3.02) | 5 (3.76) |  |
| No |  |  |  |  |  |

Abbreviations: CHFP-2016, Chinese Food Guide Pagoda 2016; BMI, Body Mass Index

a standard deviation

b Chinese Food Guide Pagoda 2016 quartiles

c Q1-Q4: Chinese Food Guide Pagoda 2016 quartile of score. the range may overlap across adjacent quartiles due to rounding to one digit.

**Supplementary Table 5.** **Characteristics by Chinese Food Guide Pagoda 2022 quartiles among participants from the BCCS-CW**

|  | NO. (%) (n=532) a | | | | |
| --- | --- | --- | --- | --- | --- |
| Characteristic | Quartile 1 c | Quartile 2 | Quartile 3 | Quartile 4 | *P* |
| Age at survey, mean (SD), y b | 54.08(10.65) | 52.92(9.66) | 51.26(8.83) | 52.21(10.43) | 0.13 |
| CHFP-2016，mean (SD/SE) | 15.72(1.84) | 19.63(1.05) | 22.51(1.09) | 26.06(2.03) | <0.01 |
| CHFP-2022，mean (SD/SE) | 15.76(1.80) | 19.74(0.90) | 22.66(0.86) | 26.03(1.57) | <0.01 |
| Stopped menstruating for over a year |  |  |  |  | 0.24 |
| Yes | 63 (43.37) | 64 (48.12) | 78 (58.65) | 69 (51.88) |  |
| No | 70 (56.63) | 69 (51.88) | 55 (41.35) | 64 (48.12) |  |
| Marital status |  |  |  |  | 0.83 |
| Married or living with partner | 119 (89.47) | 123 (92.48) | 129 (96.99) | 125 (93.98) |  |
| Never married, separated or otherwise | 14 (10.53) | 10 (7.52) | 4 (3.01) | 8 (6.02) |  |
| BMI at survey, kg/m2 |  |  |  |  | 0.90 |
| < 25 | 65 (48.87) | 66 (49.62) | 55 (41.35) | 59 (44.36) |  |
| ≥ 25 | 68 (51.13) | 67 (50.38) | 78 (58.65) | 74 (55.64) |  |
| Educational level, y |  |  |  |  | 0.49 |
| ≤ 6 | 64 (48.12) | 60 (45.11) | 50 (37.59) | 46 (34.59) |  |
| 7-9 | 53 (39.85) | 57 (42.86) | 65 (48.87) | 68 (51.13) |  |
| 10-12 | 11 (8.27) | 13 (9.77) | 15 (11.28) | 13 (9.77) |  |
| >12 | 5 (3.76) | 3 (2.26) | 3 (2.26) | 6 (4.51) |  |
| Annual income level, ¥ |  |  |  |  | 0.91 |
| < 12k | 27 (20.30) | 25 (18.80) | 25 (18.80) | 19 (14.29) |  |
| 12k-36k | 73 (54.89) | 66 (49.62) | 70 (52.63) | 77 (57.89) |  |
| 36K-60k | 21 (15.79) | 29 (21.08) | 25 (8.80) | 23 (17.29) |  |
| ≥ 60k | 12 (9.02) | 13 (9.77) | 13 (9.77) | 14 (10.53) |  |
| Family history of cancer |  |  |  |  | 0.90 |
| Yes | 28 (21.05) | 24 (18.05) | 24 (18.05) | 24 (18.05) |  |
| No | 105 (78.95) | 109 (81.95) | 109 (81.95) | 109 (81.95) |  |
| Have taken hormones, progesterone, or other female hormones |  |  |  |  | 0.71 |
| Other | 2 (1,05) | 4 (3.01) | 2 (1,05) | 4 (3.01) |  |
| No | 131 (98.95) | 129 (96.99) | 131 (98.95) | 129 (96.99) |  |

Abbreviations: CHFP-2022, Chinese Food Pagoda 2022; BMI, Body Mass Index

a Relative proportion (%).

b Standard deviation

c Q1-Q4: Chinese Food Guide Pagoda 2022 quartile of score. the range may overlap across adjacent quartiles due to rounding to one digit.

**Supplementary Table 6. Characteristics by Chinese Food Guide Pagoda 2016 quartiles among participants from the National Health and Nutrition Examination Survey (NHANES) 2005–2016.**

|  | NO. (%) (n=71370868) | | | | |
| --- | --- | --- | --- | --- | --- |
| Characteristic | Quartile 1a | Quartile 2 | Quartile 3 | Quartile 4 | *P* |
| Age at survey, mean (SE) b | 43.22 (0.41) | 46.21(0.61) | 47.59 (0.56) | 49.85(0.43) | < 0.0001 |
| Energy, mean (SE) | 1728.77 (20.57) | 1754.39 (16.85) | 1766.26 (16.90) | 1868.06(17.84) | < 0.0001 |
| MET, mean (SE), MET * min / week | 3320.38 (110.72) | 3006.17 (119.98) | 2998.24 (131.48) | 2628.80(103.05) | < 0.001 |
| CHFP-2016 score, mean (SE) | 24.34 (0.08) | 29.65 (0.04) | 33.31 (0.04) | 38.68(0.10) | < 0.0001 |
| CHFP-2022 score, mean (SE) | 23.76 (0.08) | 28.98 (0.04) | 32.70(0.04) | 38.14(0.10) | < 0.0001 |
| Stopped menstruating for over a year |  |  |  |  | < 0.0001 |
| Yes | 6148947 (36.17) | 7772728 (43.46) | 8265685 (45.76) | 9271901 (50.34) |  |
| No | 10852170 (63.83) | 10112747 (56.54) | 9799010 (54.24) | 9147681 (49.66) |  |
| Ethnic |  |  |  |  | < 0.0001 |
| White | 11279476 (66.35) | 12746803 (71.27) | 13364527 (73.98) | 14073148 (76.40) |  |
| Black | 2774710 (16.32) | 2063768 (11.54) | 1379189 (7.63) | 1133769 (6.16) |  |
| Spanish | 1139927 (6.71) | 1029525 (5.76) | 1219220 (6.75) | 1288963 (7.00) |  |
| Other | 1807003 (10.63) | 2045379 (11.44) | 2101759 (11.63) | 1923702 (10.44) |  |
| Marital status |  |  |  |  | < 0.0001 |
| Married or living with partner | 9278364 (54.58) | 10800465 (60.39) | 11282665 (62.46) | 12120001 (65.80) |  |
| Never married, separated or otherwise | 7722752 (45.42) | 7085010 (39.61) | 6782030 (37.54) | 6299580 (34.20) |  |
| Education level, y |  |  |  |  | < 0.0001 |
| < 9 | 479395 (2.82) | 488032 (2.73) | 647709 (3.59) | 649834 (3.53) |  |
| 9-12 | 10644826 (62.61) | 11715486 (65.50) | 12358582 (68.41) | 13572926 (73.69) |  |
| > 12 | 5876896 (34.57) | 5681956 (31.77) | 5058404 (28.00) | 4196822 (22.78) |  |
| Income level, $ |  |  |  |  | < 0.0001 |
| < 25k | 5003108 (29.43) | 4962083 (27.74) | 4506185 (24.94) | 3777193 (20.51) |  |
| 25-55k | 4963571 (29.20) | 4670781 (26.11) | 5064367 (28.03) | 5119993 (27.80) |  |
| 55-75k | 2221962 (13.07) | 2443237 (13.66) | 2181935 (12.08) | 2316488 (12.58) |  |
| ≥ 75k | 4812475 (28.31) | 5809374 (32.48) | 6312208 (34.94) | 7205907 (39.12) |  |
| Have taken hormones, progesterone, or other female hormones |  |  |  |  | 0.02 |
| Other | 14511298 (85.35) | 14919689 (83.42) | 14886554 (82.41) | 15476222 (84.02) |  |
| No | 2489819 (14.65) | 2965786 (16.58) | 3178141(17.59) | 2943360 (15.98) |  |
| Diabetes |  |  |  |  | 0.18 |
| Yes | 853395 (5.03) | 1176810 (6.45) | 1409343 (8.01) | 1363449 (7.34) |  |
| No | 16113588 (94.97) | 17057257 (93.55) | 16183710 (91.99) | 17213316 (92.66) |  |
| Dyslipidemia |  |  |  |  | 0.14 |
| Yes | 10974013 (64.55) | 12253605 (68.51) | 12024743 (66.56) | 12702278 (68.96) |  |
| No | 6027104 (35.45) | 5631870 (31.49) | 6039952 (33.44) | 5717304 (31.04) |  |
| Cardiovascular diseases |  |  |  |  | 0.53 |
| Yes | 848088 (4.99) | 882361 (4.93) | 1036507 (5.74) | 1115920 (6.06) |  |
| No | 16153029 (95.01) | 17003113 (95.07) | 17028188 (94.26) | 17303662 (93.94) |  |
| BMI, kg / m2 |  |  |  |  | 0.02 |
| < 25 | 6034173 (35.49) | 6159057 (34.44) | 6755967 (37.40) | 7401868 (40.18) |  |
| ≥ 25 | 10966944 (64.51) | 11726418 (65.56) | 11308727 (62.60) | 11017713 (59.82) |  |

Abbreviations: CHFP-2016, Chinese Food Guide Pagoda 2016; CHFP-2022, Chinese Food Guide Pagoda 2022; BMI, Body Mass Index

a Relative proportion (%).

b Standard deviation

c Q1-Q4: Chinese Food Guide Pagoda 2016 quartile of score. the range may overlap across adjacent quartiles due to rounding to one digit.

**Supplementary Table 7. Characteristics by Chinese Food Guide Pagoda 2016 quartiles among participants from the National Health and Nutrition Examination Survey (NHANES) 2005–2016.**

|  | NO. (%) (n=71370868) a | | | | |
| --- | --- | --- | --- | --- | --- |
| Characteristic | Quartile 1c | Quartile 2 | Quartile 3 | Quartile 4 | *P* |
| Age at survey, mean (SE) b | 43.35(0.43) | 46.31(0.58) | 47.72(0.57) | 49.52(0.45) | < 0.0001 |
| Energy, mean (SE) | 1733.53(19.54) | 1729.97(14.75) | 1763.97(16.16) | 1888.86(17.63) | < 0.0001 |
| MET, mean (SE), MET * min / week | 3345.72(108.01) | 2981.02(142.14) | 3047.70(131.58) | 2582.73(99.73) | < 0.0001 |
| CHFP-2016 score, mean (SE) | 24.44(0.08) | 29.68(0.04) | 33.30(0.04) | 38.59(0.10) | < 0.0001 |
| CHFP-2022 score, mean (SE) | 23.75(0.07) | 28.95(0.04) | 32.72(0.04) | 38.17(0.10) | < 0.0001 |
| Stopped menstruating for over a year |  |  |  |  | < 0.0001 |
| Yes | 6256368 (36.53) | 7919371 (44.32) | 8270706 (46.43) | 9012816 (48.56) |  |
| No | 10871978 (63.47) | 9950039 (55.68) | 9543319 (53.57) | 9546271 (51.44) |  |
| Ethnic |  |  |  |  | < 0.0001 |
| White | 11585094 (67.64) | 12626104 (70.66) | 12993905 (72.94) | 14258851 (76.83) |  |
| Black | 2733651 (15.96) | 2042777 (11.43) | 1471011 (8.26) | 1103998 (5.95) |  |
| Spanish | 1093283 (6.38) | 1102515 (6.17) | 1247439 (7.00) | 1234398 (6.65) |  |
| Other | 1716318 (10.02) | 2098015 (11.74) | 2101670.36(11.80) | 1961840 (10.57) |  |
| Marital status |  |  |  |  | < 0.0001 |
| Married or living with partner | 9474928 (55.32) | 10539407 (58.98) | 11332964 (63.62) | 12134198 (65.38) |  |
| Never married, separated or otherwise | 7653418 (44.68) | 7330003 (41.02) | 6481062 (36.38) | 6424889 (34.62) |  |
| Education level, y |  |  |  |  | < 0.0001 |
| < 9 | 467758.95(2.73) | 527836.48(2.95) | 679260.12(3.81) | 590114.60(3.18) |  |
| 9-12 | 10726832.34(62.63) | 11565709.45(64.72) | 12216863.80(68.58) | 13782413.77(74.26) |  |
| > 12 | 5933754.33(34.64) | 5775863.90(32.32) | 4917901.85(27.61) | 4186558.77(22.56) |  |
| Income level, $ |  |  |  |  | < 0.0001 |
| < 25k | 5043690 (29.45) | 4909005 (27.47) | 4469639 (25.09) | 3826236 (20.62) |  |
| 25-55k | 4858016 (28.36) | 4886037 (27.34) | 5026242 (28.22) | 5048417 (27.20) |  |
| 55-75k | 2227236 (13.00) | 2350298 (13.15) | 2146563 (12.05) | 2439524 (13.14) |  |
| ≥ 75k | 4999404 (29.19) | 5724070 (32.03) | 6171581 (34.64) | 7244910 (39.04) |  |
| Have taken hormones, progesterone, or other female hormones |  |  |  |  | 0.04 |
| Other | 14716863 (85.92) | 14890915 (83.33) | 14611221 (82.02) | 15574764 (83.92) |  |
| No | 2411482 (14.08) | 2978495 (16.67) | 3202805 (17.98) | 2984323 (16.08) |  |
| Diabetes |  |  |  |  | 0.01 |
| Yes | 837017 (4.89) | 1312923 (7.35) | 1351481 (7.59) | 1349577 (7.27) |  |
| No | 16291329 (95.11) | 16556487 (92.65) | 16462544 (92.41) | 17209510 (92.73) |  |
| Dyslipidemia |  |  |  |  | 0.40 |
| Yes | 11166893 (65.20) | 12017235 (67.25) | 12122006 (68.05) | 12648503 (68.15) |  |
| No | 5961452 (34.80) | 5852175 (32.75) | 5692019 (31.95) | 5910584 (31.85) |  |
| Cardiovascular diseases |  |  |  |  | 0.61 |
| Yes | 870176 (5.08) | 896840 (5.02) | 997183 (5.60) | 1118678 (6.03) |  |
| No | 16258170 (94.92) | 16972570 (94.98) | 16816842 (94.40) | 17440409 (93.97) |  |
| BMI, kg / m2 |  |  |  |  | 0.003 |
| < 25 | 6044106 (35.29) | 6276213 (35.12) | 6314299 (35.45) | 7716448 (41.58) |  |
| ≥ 25 | 11084239 (64.71) | 11593197 (64.88) | 11499727 (64.55) | 10842639 (58.42) |  |

Abbreviations: CHFP-2016, Chinese Food Guide Pagoda 2016; CHFP-2022, Chinese Food Guide Pagoda 2022; BMI, Body Mass Index

a Relative proportion (%).

b Standard deviation

c Q1-Q4: Chinese Food Guide Pagoda 2016 quartile of score. the range may overlap across adjacent quartiles due to rounding to one digit.

**Supplementary Table 8. ORs (95% CI) for breast cancer specific events by CHFP-2016 score in stratified analyses.**

| Subgroup | Total NO. | Case, No. (%) | CHFP-2016 OR (95% CI) a | *P* | *P* for interaction |
| --- | --- | --- | --- | --- | --- |
| **Stopped menstruating for over a year** |  |  |  |  | 0.816 |
| Yes | 31459261 | 305047 | 0.93(0.89,0.97) | 0.002 |  |
| No | 39911608 | 31154214 | 0.98(0.88,1.09) | 0.701 |  |
| **Ethnic** |  |  |  |  | 0.002 |
| White | 51463954 | 277290 | 0.93(0.89,0.98) | 0.005 |  |
| Black | 7351437 | 34374 | 0.99(0.89,1.11) | 0.901 |  |
| Spanish | 4677635 | 7604 | 1.23(1.45,1.31) | <0.0001 |  |
| **Marital status** |  |  |  |  | 0.696 |
| Married or living with partner | 43481496 | 239744 | 0.92(0.86,0.98) | 0.009 |  |
| Never married, separated or otherwise | 27889372 | 108103 | 0.98(0.91,1.04) | 0.460 |  |
| **Educational level, y** |  |  |  |  | 0.338 |
| ＜9 | 2464970 | 9300 | 0.95(0.84,1.06) | 0.025 |  |
| 9-12 | 20814079 | 71822 | 0.93(0.84,1.03) | 0.167 |  |
| ＞12 | 48291819 | 266725 | 0.94(0.89,0.99) | 0.334 |  |
| **Annual income level, $** |  |  |  |  | 0.322 |
| ＜25k | 18248570 | 80493 | 0.94(0.84,1.05) | 0.246 |  |
| 25-55k | 19818712 | 126549 | 0.93(0.86,1.00) | 0.056 |  |
| 55-75k | 9164622 | 26988 | 1.05(0.93,1.18) | 0.451 |  |
| ≥ 75 | 24139964 | 112817 | 0.91(0.82,1.00) | 0.052 |  |
| **BMI at survey, kg/m2** |  |  |  |  | 0.97 |
| ＜25 | 26351066 | 139373 | 0.92(0.87,0.98) | 0.008 |  |
| ≥ 25 | 45019802 | 208474 | 0.94(0.87,1.02) | 0.122 |  |
| **Diabetes** |  |  |  |  | 0.726 |
| Yes | 4850999 | 48056 | 0.89(0.71,1.13) | 0.341 |  |
| No | 66519870 | 299791 | 0.93(0.87,0.98) | 0.005 |  |
| **Dyslipidemia** |  |  |  |  | 0.016 |
| Yes | 47954638 | 263964 | 0.95(0.91,1.00) | 0.036 |  |
| No | 23416230 | 83882 | 0.85(0.74,0.98) | 0.025 |  |
| **Cardiovascular diseases** |  |  |  |  | 0.099 |
| Yes | 3882877 | 64960 | 0.90(0.80,1.00) | 0.051 |  |
| No | 67487991 | 282887 | 0.94(0.89,0.99) | 0.029 |  |
| **Have taken hormones, progesterone, or other female hormones** |  |  |  |  | 0.542 |
| Other | 11577105 | 297158 | 0.92(0.88,0.97) | <0.001 |  |
| No | 59793763 | 50689 | 0.95(0.85,1.08) | 0.436 |  |

Abbreviations: OR (Odds ratio), CI (Confidence Interval), Chinese Food Guide Pagoda 2016(CHFP-2016).

a Logistic regression model was additionally adjusted for age at survey, whether stopped menstruating for over a year, energy, BMI, ethnic, marital status, education level, income level, diabetes, cardiovascular disease, dyslipidemia, MET, whether have taken hormones, progesterone, or other female hormones.

**Supplementary Table 9. ORs (95% CI) for breast cancer specific events by CHFP-2022 score in stratified analyses.**

| Subgroup | Total NO. | Case, No. (%) | CHFP-2016 OR (95% CI) a | *P* | *P* for interaction |
| --- | --- | --- | --- | --- | --- |
| **Stopped menstruating for over a year** |  |  |  |  | 0.88 |
| Yes | 31459261 | 305047 | 0.93 (0.89,0.98) | 0.003 |  |
| No | 39911608 | 31154214 | 0.99 (0.89,1.09) | 0.79 |  |
| **Ethnic** |  |  |  |  | 0.003 |
| White | 51463954 | 277290 | 0.94 (0.90,0.98) | 0.01 |  |
| Black | 7351437 | 34374 | 1.00 (0.90,1.11) | 0.95 |  |
| Spanish | 4677635 | 7604 | 1.17 (1.12,1.22) | <0.0001 |  |
| **Marital status** |  |  |  |  | 0.89 |
| Married or living with partner | 43481496 | 239744 | 0.92 (0.87,0.99) | 0.02 |  |
| Never married, separated or otherwise | 27889372 | 108103 | 0.97 (0.90,1.05) | 0.44 |  |
| **Educational level, y** |  |  |  |  | 0.33 |
| ＜9 | 2464970 | 9300 | 0.94 (0.84,1.05) | 0.27 |  |
| 9-12 | 20814079 | 71822 | 0.92 (0.84,1.03) | 0.17 |  |
| ＞12 | 48291819 | 266725 | 0.95 (0.90,1.00) | 0.04 |  |
| **Annual income level, $** |  |  |  |  | 0.34 |
| ＜25k | 18248570 | 80493 | 0.94 (0.83,1.05) | 0.27 |  |
| 25-55k | 19818712 | 126549 | 0.94 (0.87,1.01) | 0.1 |  |
| 55-75k | 9164622 | 26988 | 1.05 (0.92,1.19) | 0.45 |  |
| ≥ 75 | 24139964 | 112817 | 0.91 (0.84,1.00) | 0.05 |  |
| **BMI at survey, kg/m2** |  |  |  |  | 0.91 |
| ＜25 | 26351066 | 139373 | 0.93 (0.87,0.99) | 0.02 |  |
| ≥ 25 | 45019802 | 208474 | 0.94 (0.88,1.02) | 0.12 |  |
| **Diabetes** |  |  |  |  | 0.55 |
| Yes | 4850999 | 48056 | 0.88 (0.70,1.12) | 0.29 |  |
| No | 66519870 | 299791 | 0.94 (0.89,0.98) | 0.01 |  |
| **Dyslipidemia** |  |  |  |  | 0.02 |
| Yes | 47954638 | 263964 | 0.95 (0.91,1.00) | 0.05 |  |
| No | 23416230 | 83882 | 0.85 (0.74,0.98) | 0.02 |  |
| **Cardiovascular diseases** |  |  |  |  | 0.07 |
| Yes | 3882877 | 64960 | 0.88 (0.77,1.01) | 0.06 |  |
| No | 67487991 | 282887 | 0.95 (0.90,1.00) | 0.04 |  |
| **Have taken hormones, progesterone, or other female hormones** |  |  |  |  | 0.65 |
| Other | 11577105 | 297158 | 0.93 (0.88,0.97) | 0.002 |  |
| No | 59793763 | 50689 | 0.93 (0.85,1.08) | 0.41 |  |

Abbreviations: OR (Odds Ratio), CI (Confidence Interval), Chinese Food Guide Pagoda 2022(CHFP-2022).

a Logistic regression model was additionally adjusted for age at survey, whether stopped menstruating for over a year, energy, BMI, ethnic, marital status, education level, income level, diabetes, cardiovascular disease, dyslipidemia, MET, whether have taken hormones, progesterone, or other female hormones.

**Supplementary Table 10. ORs (95% CI) for breast cancer by dietary recommendation adherence scores** **in BCCS-CW**

| Dietary recommendations | Case（n=133） | Control（n=399） | By 5-point increase | *P* d |
| --- | --- | --- | --- | --- |
| CHFP-2016 score |  |  |  |  |
| Crude OR | 0.93(0.88-0.98) | 1.000 (Ref.) | 0.71(0.54-0.92) | 0.01 |
| Multivariable-adjusted OR |  |  |  |  |
| Multivariate Model 1a | 0.93(0.88-0.98) | 1.000 (Ref.) | 0.71(0.54-0.92) | 0.01 |
| Multivariate Model 2b | 0.93(0.88-0.98) | 1.000 (Ref.) | 0.69(0.52-0.91) | 0.01 |
| Multivariate Model 3c | 0.93(0.88-0.98) | 1.000 (Ref.) | 0.69(0.52-0.91) | 0.01 |
| CHFP-2022 score |  |  |  |  |
| Crude OR | 0.92(0.87-0.97) | 1.000 (Ref.) | 0.66(0.51-0.87) | 0.003 |
| Multivariable-adjusted OR |  |  |  |  |
| Multivariate Model 1a | 0.92(0.87-0.97) | 1.000 (Ref.) | 0.66(0.51-0.87) | 0.003 |
| Multivariate Model 2b | 0.92(0.87-0.97) | 1.000 (Ref.) | 0.64(0.48-0.85) | 0.002 |
| Multivariate Model 3c | 0.91(0.86-0.97) | 1.000 (Ref.) | 0.64(0.48-0.85) | 0.002 |

Abbreviations: CHFP-2016, Chinese Food Guide Pagoda 2016; CHFP-2022, Chinese Food Guide Pagoda 2022; CI, Confidence Interval

a Conditional logistic regression model was adjusted for age at survey, whether stopped menstruating for over a year.

b Conditional logistic regression model was additionally adjusted for age at survey, whether stopped menstruating for over a year, BMI, marital status, education level, income level.

c Conditional logistic regression model was additionally adjusted for age at survey, whether stopped menstruating for over a year, BMI, marital status, education level, income level, family history of cancer，whether have taken hormones, progesterone, or other female hormones.

d Linearity of associations between dietary scores and breast cancer specific events were tested using restricted cubic spline function. The *P* for linearity values for CHFP-2016, CHFP-2022 were over 0.05.

**Supplementary Table 11. ORs (95% CI) for breast cancer by dietary recommendation adherence scores in the National Health and Nutrition Examination Survey (NHANES)2005-2016**

| Dietary recommendations | Case | Control | By 5-point increase | *P* d |
| --- | --- | --- | --- | --- |
| CHFP-2016 score |  |  |  |  |
| Crude OR | 0.97(0.93,1.00) | 1.00 (Ref.) | 0.84(0.69,1.02) | 0.08 |
| Multivariable-adjusted OR |  |  |  |  |
| Multivariate Model 1a | 0.92(0.87, 0.97) | 1.00 (Ref.) | 0.71(0.57, 0.89) | 0.003 |
| Multivariate Model 2b | 0.90(0.85, 0.96) | 1.00 (Ref.) | 0.69(0.55, 0.86) | 0.001 |
| Multivariate Model 3c | 0.90(0.85, 0.96) | 1.00 (Ref.) | 0.69(0.55, 0.86) | 0.001 |
| CHFP-2022 score |  |  |  |  |
| Crude OR | 0.97(0.93,1.01) | 1.00 (Ref.) | 0.86(0.71,1.05) | 0.13 |
| Multivariable-adjusted OR |  |  |  |  |
| Multivariate Model 1a | 0.94(0.90, 0.98) | 1.00 (Ref.) | 0.73(0.59, 0.91) | 0.01 |
| Multivariate Model 2b | 0.93(0.89, 0.98) | 1.00 (Ref.) | 0.71(0.56, 0.88) | 0.003 |
| Multivariate Model 3c | 0.93(0.89, 0.97) | 1.00 (Ref.) | 0.70(0.56, 0.88) | 0.002 |

Abbreviations: CHFP-2016, Chinese Food Guide Pagoda 2016; CHFP-2022, Chinese Food Guide Pagoda 2022; CI, Confidence Interval

a Logistic regression model was adjusted for age at survey, whether stopped menstruating for over a year and energy.

b Logistic regression model was additionally adjusted for age at survey, whether stopped menstruating for over a year, energy, BMI, ethnic, marital status, education level, income level.

c Logistic regression model was additionally adjusted for age at survey, whether stopped menstruating for over a year, energy, BMI, ethnic, marital status, education level, income level, hypertension, diabetes, cardiovascular disease, dyslipidemia, MET.

d Linearity of associations between dietary scores and breast cancer specific events were tested using restricted cubic spline function. The *P* for linearity values for CHFP-2016, CHFP-2022 were over 0.05.
