# Supplementary material for: Adherence to Culturally Tailored Dietary Guideline and Breast Cancer Risk Reduction: A Cross-Cultural Nested Case-Control Study
Source: Research Square preprint supplement (doi:10.21203/rs.3.rs-6867878/v1), 2025-07-14
Supplement: Supplementary file 2 [file 65989f86e8cd7b1903020b56.docx]

**Supplementary methods**

1. Dyslipidemia was assessed using six questions from the NHANES Reproductive Health Questionnaire:
2. Total cholesterol (mg/dL) ≥ 200 mg/dL (5.2 mmol/L).
3. Triglycerides (TG) ≥ 150 mg/dL (1.7 mmol/L).
4. Low-density lipoprotein (LDL) cholesterol ≥ 130 mg/dL (3.4 mmol/L).
5. High-density lipoprotein (HDL) cholesterol ≤ 40 mg/dL (1.0 mmol/L).
6. Whether the participant was informed by a doctor of high cholesterol levels.
7. Use of cholesterol medication.
8. Diabetes diagnosis was based on:
9. A doctor informing the participant of diabetes.
10. Glycohemoglobin HbA1c (%) ≥ 6.5%.
11. Fasting glucose (mmol/L) ≥ 126.
12. Two-hour OGTT blood glucose (mmol/L) ≥ 200.
13. Use of diabetes medication or insulin.
14. Cardiovascular disease was determined based on a single question from the NHANES Reproductive Health Questionnaire: “Have you ever been told you had (congestive) heart failure, coronary heart disease, angina/angina pectoris, heart attack, or stroke?”
15. MET

MET = Movement Time * Movement Equivalent（Met）

1. All units of exercise time in this article are converted to weeks.

2. Five categories of activities are used to calculate MET:

- - - 1. Walk or bicycle
      2. Tasks home yard
      3. Muscle strength
      4. Work activity
      5. Recreational activity
