# Supplementary material for: Adherence to Culturally Tailored Dietary Guideline and Breast Cancer Risk Reduction: A Cross-Cultural Nested Case-Control Study
Source: Research Square preprint supplement (doi:10.21203/rs.3.rs-6867878/v1), 2025-07-14
Supplement: Supplementary file 3 [file be90c7fdf82f387899434601.xlsx]

## Sheet: Sheet1
Age，mean(SD/SE)a, y	52.62 (9.97)	52.62 (9.95)	1			60.83 (2.01)	46.72 (0.33)	<0.0001
CHFP-2016，mean (SD/SE)	20.26 (4.34)	21.22 (4.00)	0.02			30.52 (0.66)	31.65 (0.10)	0.04
CHFP-2022，mean (SD/SE)	20.22 (4.29)	21.32 (3.89)	0.01			30.04 (0.66)	31.05 (0.11)	0.08
Energy，mean (SE),						1768.72 (102.73)	1780.69 (9.25)	0.91
MET，mean (SE), MET * min / week						2446.68 (807.09)	2984.24 (68.22)	0.51
Stopped menstruating for over a year			1					<0.0001
Yes	64 (48.12)	194 (48.62)				305047 (87.70)	31154214 (43.86)
No	69 (51.88)	205 (51.38)				42800 (12.30)	39868808 (56.14)
Marital status			0.84					0.28
Married or living with partner	123 (92.48)	373 (93.48)				239743 (68.92)	43241752 (60.88)
Never married, separated or otherwise	10 (7.52)	26 (6.52)				108103 (31.08)	27781269 (39.12)
BMI at survey, kg/m2 c			0.08					0.74
< 25	52 (39.10)	193 (48.37)				139372 (40.07)	26211693 (36.91)
≥ 25	81 (60.90)	206 (51.63)				208474 (59.93)	44811328 (63.09)
Have taken hormones, progesterone, or other female hormones			0.74					0.76
Other	131 (98.50)	389 (97.49)				297158 (85.43)	59496605 (83.77)
No	2 (1.50)	10 (2.51)				50689 (14.57)	11526416 (16.23)
Educational level, y			0.76					0.36
≤ 6	58 (43.61)	162 (40.60)			< 9	9300 (2.67)	2255669 (3.18)
45847	61 (45.86)	184 (45.61)			45912	71821 (20.65)	20742256 (29.20)
45942	10 (7.52)	42 (10.53)			> 12	266724 (76.68)	48025094 (67.62)
> 12	4 (3.01)	13 (3.26)
Annual income level, ¥			0.37		Annual income level, $			0.67
< 12k	22 (16.54)	74 (18.55)			≤ 25k	80493 (23.14)	18168076 (25.58)
12k-36K	80 (60.15)	206 (51.63)			25-55k	126548(36.38)	19692163 (27.73)
36K-60K	21 (15.79)	77 (19.30)			55-75k	26987 (7.76)	9136634 (12.86)
≥ 60K	10 (7.52)	42 (10.53)			≥ 75k	113817 (32.72)	24026147 (33.83)
Family history of cancer			0.1		Cardiovascular diseases			<0.001
Yes	32 (24.06)	68 (17.04)			Yes	64960 (18.67)	3817917 (5.38)
No	101 (75.94)	331 (82.96)			No	282887 (81.33)	67205104 (94.62)
				Diabetes				0.13
				Yes		48056 (13.82)	4754941 (6.69)
				No		299790 (86.18)	66268080 (93.31)
				Dyslipidemia				0.27
				Yes		263964 (75.89)	47690673 (67.15)
				No		83882 (24.11)	23332347 (32.85)
				Ethnic				0.41
				White		277289 (79.72)	51186664 (72.07)
				Black		34374 (9.88)	7317062 (10.30)
				Spanish		7604 (2.19)	4670031 (6.58)
				Other		28579 (8.22)	7849264 (11.05)

## Sheet: Sheet2
Table 2. Characteristics of participants in BCCS-CW and NHANES
	BCCS-CW(n=532), No. (%)				NHANES (n=71370868), No. (%)
	Case	Control	P			Case	Control	P
Characteristic b	(n=133)	(n=399)				(n=347847)	(n=71023021)
Age，mean(SD/SE)a, y	52.62 (9.97)	52.62 (9.95)	1			60.83 (2.01)	46.72 (0.33)	<0.0001
CHFP-2016，mean (SD/SE)	20.26 (4.34)	21.22 (4.00)	0.02			30.52 (0.66)	31.65 (0.10)	0.04
CHFP-2022，mean (SD/SE)	20.22 (4.29)	21.32 (3.89)	0.01			30.04 (0.66)	31.05 (0.11)	0.08
Energy，mean (SE),						1768.72 (102.73)	1780.69 (9.25)	0.91
MET，mean (SE), MET * min / week						2446.68 (807.09)	2984.24 (68.22)	0.51
Stopped menstruating for over a year			1					<0.0001
Yes	64 (48.12)	194 (48.62)				305047 (87.70)	31154214 (43.86)
No	69 (51.88)	205 (51.38)				42800 (12.30)	39868808 (56.14)
Marital status			0.84					0.28
Married or living with partner	123 (92.48)	373 (93.48)				239743 (68.92)	43241752 (60.88)
Never married, separated or otherwise	10 (7.52)	26 (6.52)				108103 (31.08)	27781269 (39.12)
BMI at survey, kg/m2 c			0.08					0.74
< 25	52 (39.10)	193 (48.37)				139372 (40.07)	26211693 (36.91)
≥ 25	81 (60.90)	206 (51.63)				208474 (59.93)	44811328 (63.09)
Have taken hormones, progesterone, or other female hormones			0.74					0.76
Other	131 (98.50)	389 (97.49)				297158 (85.43)	59496605 (83.77)
No	2 (1.50)	10 (2.51)				50689 (14.57)	11526416 (16.23)
Educational level, y			0.76					0.36
≤ 6	58 (43.61)	162 (40.60)			< 9	9300 (2.67)	2255669 (3.18)
7-9	61 (45.86)	184 (45.61)			9-12	71821 (20.65)	20742256 (29.20)
10-12	10 (7.52)	42 (10.53)			> 12	266724 (76.68)	48025094 (67.62)
> 12	4 (3.01)	13 (3.26)
Annual income level, ¥			0.37		Annual income level, $			0.67
< 12k	22 (16.54)	74 (18.55)			≤ 25k	80493 (23.14)	18168076 (25.58)
12k-36K	80 (60.15)	206 (51.63)			25-55k	126548(36.38)	19692163 (27.73)
36K-60K	21 (15.79)	77 (19.30)			55-75k	26987 (7.76)	9136634 (12.86)
≥ 60K	10 (7.52)	42 (10.53)			≥ 75k	113817 (32.72)	24026147 (33.83)
Family history of cancer			0.1		Cardiovascular diseases			<0.001
Yes	32 (24.06)	68 (17.04)			Yes	64960 (18.67)	3817917 (5.38)
No	101 (75.94)	331 (82.96)			No	282887 (81.33)	67205104 (94.62)
					Diabetes			0.13
					Yes	48056 (13.82)	4754941 (6.69)
					No	299790 (86.18)	66268080 (93.31)
					Dyslipidemia			0.27
					Yes	263964 (75.89)	47690673 (67.15)
					No	83882 (24.11)	23332347 (32.85)
					Ethnic			0.41
					White	277289 (79.72)	51186664 (72.07)
					Black	34374 (9.88)	7317062 (10.30)
					Spanish	7604 (2.19)	4670031 (6.58)
					Other	28579 (8.22)	7849264 (11.05)
Abbreviations: CHFP-2016, Chinese Food Guide Pagoda 2016; CHFP-2022, Chinese Food Guide Pagoda 2022; BMI, Body Mass Index; MET: Metabolic Equivalent of Task, min/week.
a Standard error
b Variables common to NHANES and BCCS-CW include age, menopausal state, marital status, BMI, educational level, annual income level. Because of the differences in years of education and income measures between the U.S. and China, we counted the variable educational level and annual income level separately.
c BMI was calculated as weight in kilograms divided by height in meters squared.
